# Supplementary material
Source: publisher site journal article supplement (https://www.dovepress.com/article/545808)
Supplement: Supplementary file 1 [file 545808_Supplementary%20gallery_1.docx]

**Figure S1 Screening of Candidate Genes in Colorectal Cancer**


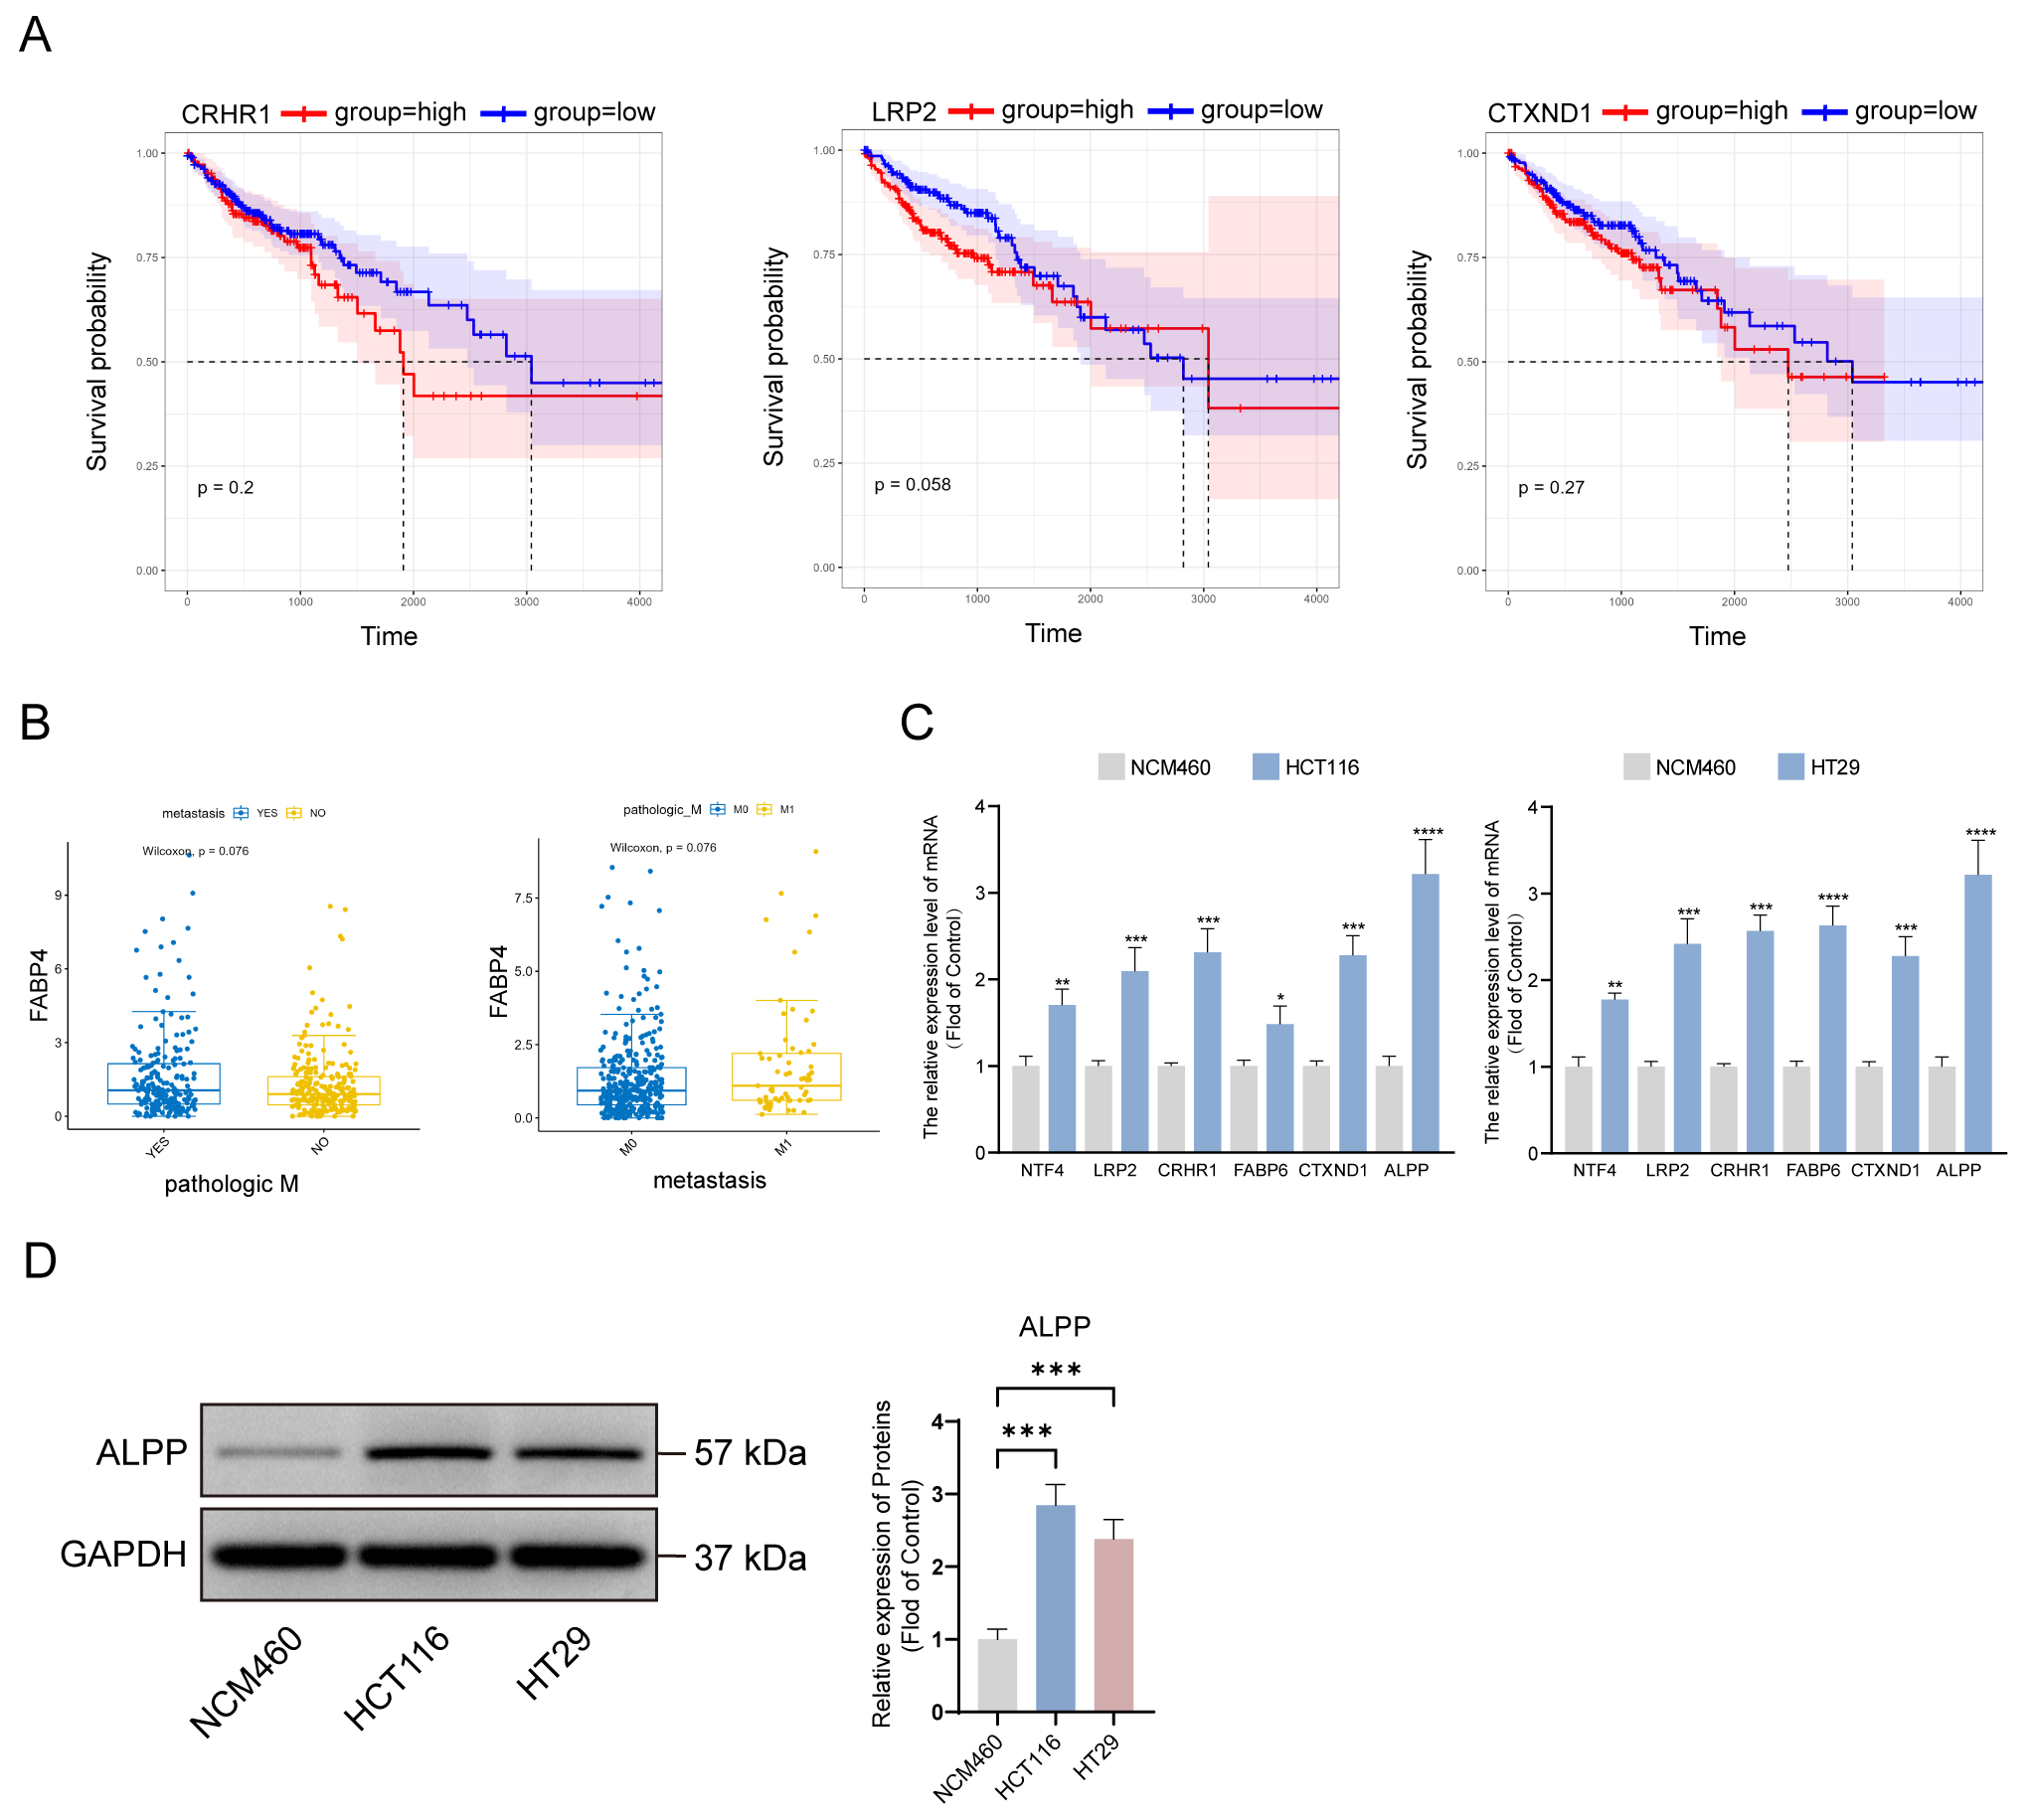


(A) KM survival curves for LRP2, CRHR1, and CTXND1 in TCGA CRC cohort. (B) Box plots illustrating the expression levels of the FABP4 in TCGA CRC cohort based on metastasis status and M0/M1 stage. (C) qPCR assay performed in HCT116, HT29, and NCM460 cells to determine the mRNA expression levels of NTF4, LRP2, CRHR1, FABP6, CTXND1, and ALPP. (D) Detect the changes in the relative expression levels of ALPP protein in NCM460, HCT116 and HT29 cells. (When compared between the two groups, *P＜0.05, **P＜0.01, ***P＜0.001, ****P＜0.0001)

**Table S1 Primer sequence of genes used for qRT-PCR**

| Gene | Forward primer(5’ to 3’) | Reverse primer(5’ to 3’) |
| --- | --- | --- |
| ALPP | CCATACCCCCACATGCCAAT | TTTGGCTCTCGACCAGTGTC |
| NTF4 | TGCAAGGCTGATAACGCTGA | AGATACCCAGTGCCTCCTGT |
| LRP2 | GTTCAGATGACGCGGATGAAA | TCACAGTCTTGATCTTGGTCACA |
| CRHR1 | TTACTCCGAGTGCCAGGAGA | GAAATGGGGCACCACTCCAT |
| FABP4 | TGGCATGGCCAAACCTAACA | TCCTGGCCCAGTATGAAGGA |
| CTXND1 | CTGCCTCTTCCTTGTCGTGA | TCCATGATGACCTTGGCACA |
| GAPDH | AGGTCGGTGTGAACGGATTTG | GGGGTCGTTGATGGCAACA |
